# Supplementary material for: Genes That Mediate Starch Metabolism in Developing and Germinated Barley Grain
Source: PubMed Central journal article supplement (PMC7959180; doi:10.3389/fpls.2021.641325), 2021-03-01

**SUPPLEMENTARY FIGURE S1 Western blots probed with starch enzyme antibodies. (A) starch synthase SS1. (B) starch branching enzyme SBE1.** E, embryo; S, scutellum; R, rest of grain; M, marker; Rec, recombinant protein control. Numbers in lane labels refer to germination time, i.e., S24 is scutellum tissue 24 h into germination. Numbers on the sides of the gel give kDa masses for marker bands and bands of interest.

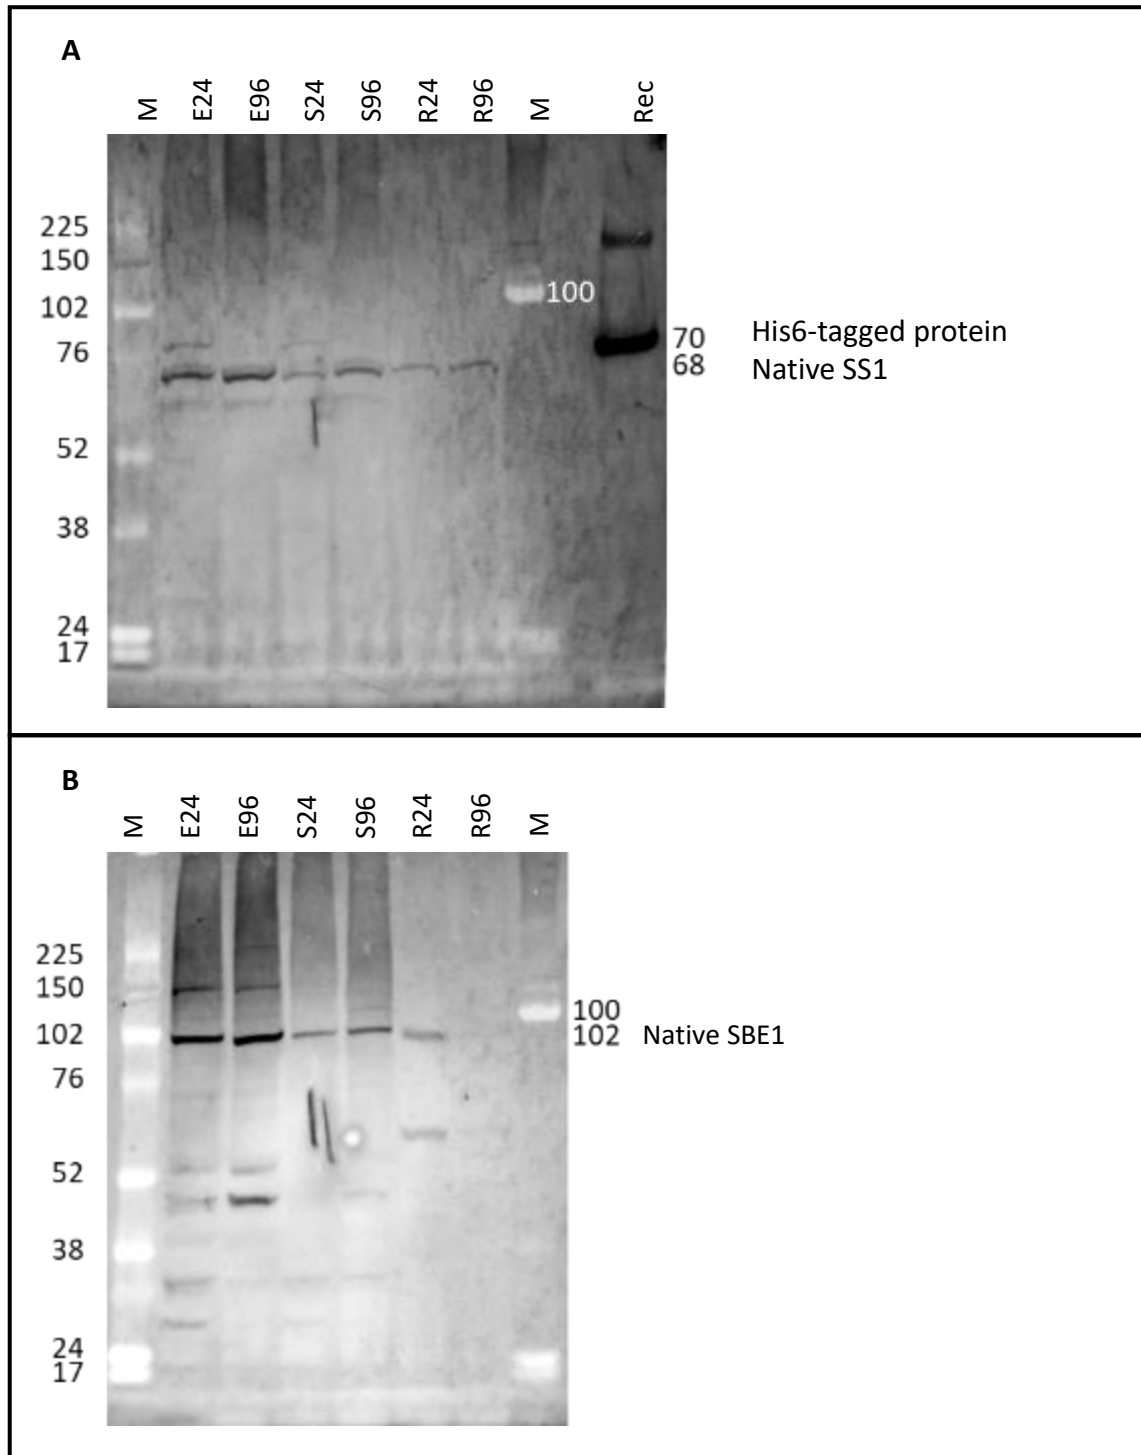

Supplement: Image_1.pdf [file Image_1.pdf]
