# Supplementary material for: Genes That Mediate Starch Metabolism in Developing and Germinated Barley Grain
Source: PubMed Central journal article supplement (PMC7959180; doi:10.3389/fpls.2021.641325), 2021-03-01

**SUPPLEMENTARY FIGURE S2 Amylopectin chain lengths in starch from different tissues.** (A) Starch from scutellum at 24 h and 96 h compared with endosperm starch. (B) Starch from embryo at 24 h and 96 h compared with endosperm starch. (C) Normalized peak areas (%) for oligosaccharides with degrees of polymerisation from 2 to 60, in all samples.

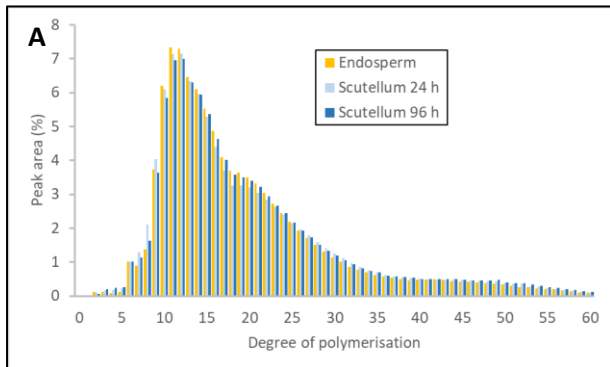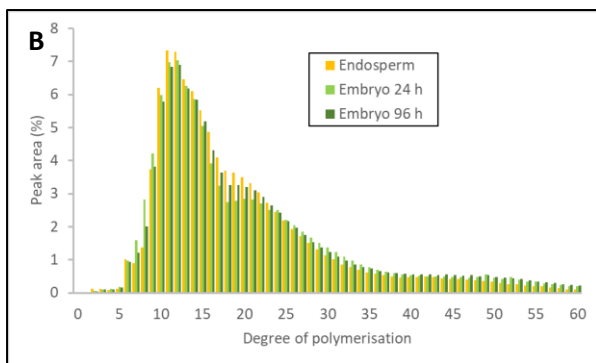

**C**

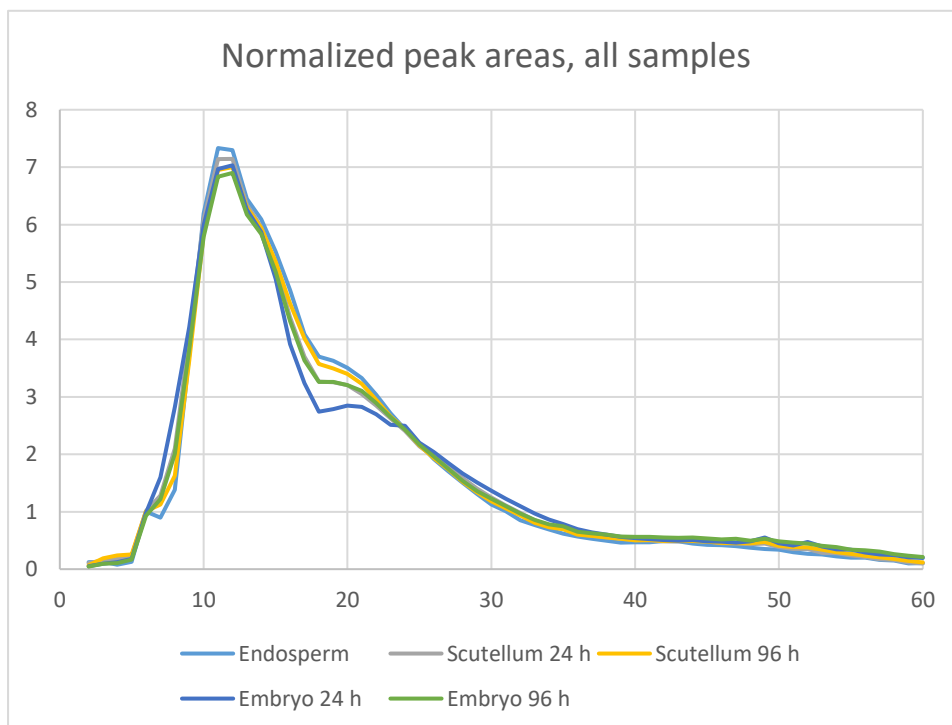

Supplement: Image_2.pdf [file Image_2.pdf]
